# Supplementary material for: Heterogeneous CaMKII-dependent synaptic compensations in CA1 pyramidal neurons from acute slices with dissected CA3
Source: bioRxiv or medRxiv preprint supplement (doi:10.1101/2021.11.09.467941), 2021-11-11
Supplement: Supplementary file [file media-1.pdf]

## Summary Data and Statistical Tests:

Table 1. Related to Fig 1B,3. Statistical test: Unpaired t-test.

| Data                    | T1           | T2            | T1 vs T2(p) |
|-------------------------|--------------|---------------|-------------|
| Amplitude (pA):         | 12.31± 0.28  | 13.92± 0.52   | 0.013       |
| Frequency (events/s):   | 1.103± 0.39  | 3.845± 0.86   | 0.008       |
| Decay time (ms):        | 7.32± 0.31   | 6.42± 0.23    | 0.039       |
| Rise time (ms):         | 1.66± 0.08   | 1.47± 0.05    | 0.065       |
| Input Resistance (MΩ):  | 150.4± 11.08 | 141.2± 12.24  | 0.582       |
| Capacitance (pF):       | 138.5± 14.11 | 133.3± 9.23   | 0.766       |
| Series Resistance (MΩ): | 14.83± 1.40  | 11.81± 0.77   | 0.091       |
| Holding current (pA):   | -25.28± 8.51 | -13.66± 10.67 | 0.403       |
| Membrane noise (pA):    | 2.858± 0.11  | 3.073± 0.12   | 0.196       |

Table 2. Related to Fig 2A-C. Statistical test: Percentile Bootstrap with Bonferroni correction.

| Data          | Fast           | Fast ≠ 0 (p) | Slow           | Slow ≠ 0 (p) | Fast vs Slow (p) |
|---------------|----------------|--------------|----------------|--------------|------------------|
| Amplitude Δ%: | 21.16±3.50     | <0.0006      | 17.81 ± 1.53   | <0.0006      | >0.9999          |
| Rise time Δ%: | -26.42 ± 1.99  | <0.0006      | -7.30 ± 0.74   | <0.0006      | <0.0006          |
| Frequency Δ%: | 832.60 ± 67.20 | <0.0006      | 230.98 ± 10.03 | <0.0006      | <0.0006          |

Table 3. Related to Fig 3C, D. Statistical test: Two-way ANOVA with Bonferroni correction.

| Data                  | SCR          |              |              | CN21        |             |              |
|-----------------------|--------------|--------------|--------------|-------------|-------------|--------------|
|                       | T1           | T2           | T1 vs T2 (p) | T1          | T2          | T1 vs T2 (p) |
| Amplitude (pA):       | 14.05 ± 0.44 | 16.57 ± 0.87 | 0.0175       | 13.86±0.79  | 14.45±0.52  | >0.9999      |
| Frequency (events/s): | 1.43 ± 0.24  | 5.011 ± 0.68 | <0.0001      | 1.67 ± 0.55 | 4.48 ± 0.55 | 0.0009       |

Table 3. Related to Fig 3F, L. Statistical test: Percentile Bootstrap with Bonferroni correction.

| Data          |      | SCR            | SCR ≠ 0 (p) | CN21           | CN21≠ 0 (p) | SCR vs CN21 (p) |
|---------------|------|----------------|-------------|----------------|-------------|-----------------|
| Amplitude Δ%: | Fast | 29.26 ± 2.42   | <0.0012     | 0.82 ± 1.90    | 1           | <0.0012         |
|               | Slow | 13.20 ± 1.37   | <0.0012     | 6.73 ± 1.62    | <0.0012     | 0.014           |
| Rise time Δ%: | Fast | -7.51 ± 1.42   | <0.0012     | 1.84 ± 1.48    | 1           | <0.0012         |
|               | Slow | -3.59 ± 0.55   | <0.0012     | -0.15 ± 0.7    | 1           | <0.0012         |
| Frequency Δ%: | Fast | 521.86 ± 21.00 | <0.0012     | 132.41± 6.54   | <0.0012     | <0.0012         |
|               | Slow | 330.87 ± 9.26  | <0.0012     | 265.49 ± 10.33 | <0.0012     | <0.0012         |
