# Supplementary material for: Heterogeneous CaMKII-dependent synaptic compensations in CA1 pyramidal neurons from acute slices with dissected CA3
Source: bioRxiv or medRxiv preprint supplement (doi:10.1101/2021.11.09.467941), 2021-11-11
Supplement: Supplementary file [file media-2.pdf]

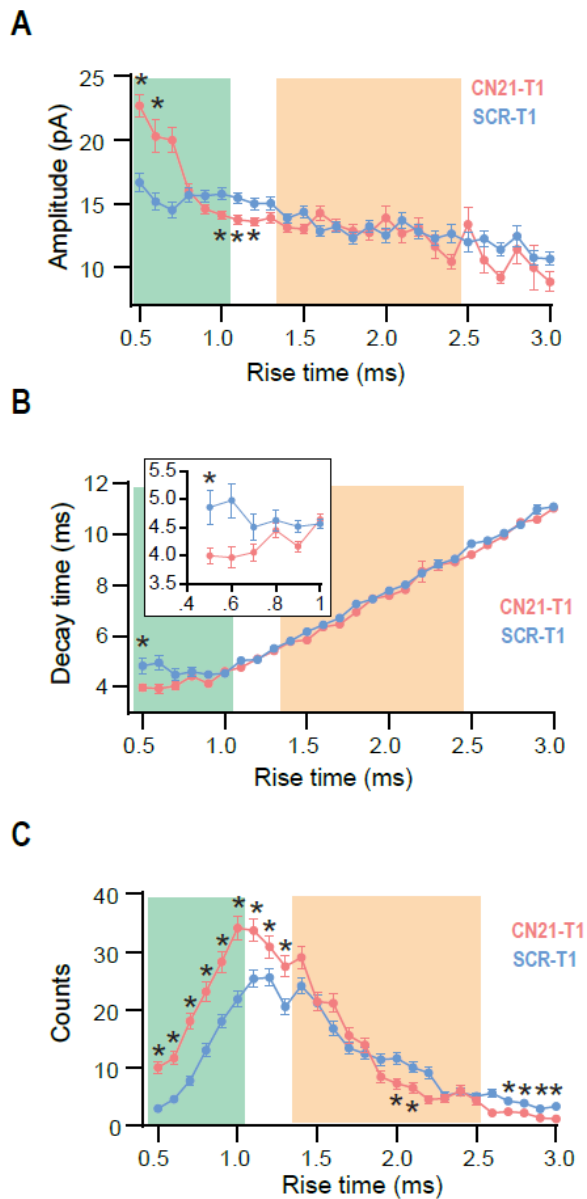

**Supplementary Figure 1. Synaptic modifications detected at T1 upon early CaMKII**

**inhibition (A)** Overlaid  $\tau_r$ -sorted mEPSC amplitude distributions at T1, revealing that after CN21, transmission was already increased for the faster rising group and diminished for an intermediate population. **(B)** Same as (A), for decay time. Inset, detail of the curves for the faster-rising group, unraveling an earlier  $\tau_r$  decrease after CN21 in this group. **(C)**

Comparison of event frequency distributions at T1 also shows an incipient upregulation of faster-rising events incidence after CN21.
